# Supplementary material for: Does the Type Matter? Verification of Different Tea Types’ Potential in the Synthesis of SeNPs
Source: MDPI journal article supplement (doi:10.3390/antiox11122489), 2022-12-18
Supplement: s1 [file s1]

## Supplementary material

# Does the Type Matter? Verification of Different Tea Types' Potential in the Synthesis of SeNPs

Aleksandra Sentkowska, Krystyna Pyrzynska

**Table S1.** The concentrations of polyphenolic compounds in postreaction mixture (in mg L<sup>-1</sup>).

|                     | Postreaction mixture |        |        |        |
|---------------------|----------------------|--------|--------|--------|
|                     | BSeNPs               | GSeNPs | RSeNPs | WSeNPs |
| EGCG                | 0.659                | 0.263  | 0.058  | 0.133  |
| Protocatechuic acid | 0.152                | 0.050  | 0.156  | 0.185  |
| Epicatechin         | 0.155                | 0.111  | 0.175  | 0.103  |
| Catechin            | <LOD                 | <LOD   | <LOD   | <LOD   |
| p-cumaric acid      | 4.750                | 1.670  | 2.186  | 5.03   |
| Chlorogenic acid    | <LOD                 | <LOD   | <LOD   | <LOD   |
| pHBA                | 19.70                | 2.236  | 9.545  | 7.865  |
| Rutin               | <LOD                 | <LOD   | <LOD   | <LOD   |
| Caffeic acid        | <LOD                 | <LOD   | <LOD   | <LOD   |
| Gallic acid         | 0.244                | 0.168  | 0.149  | 0.134  |

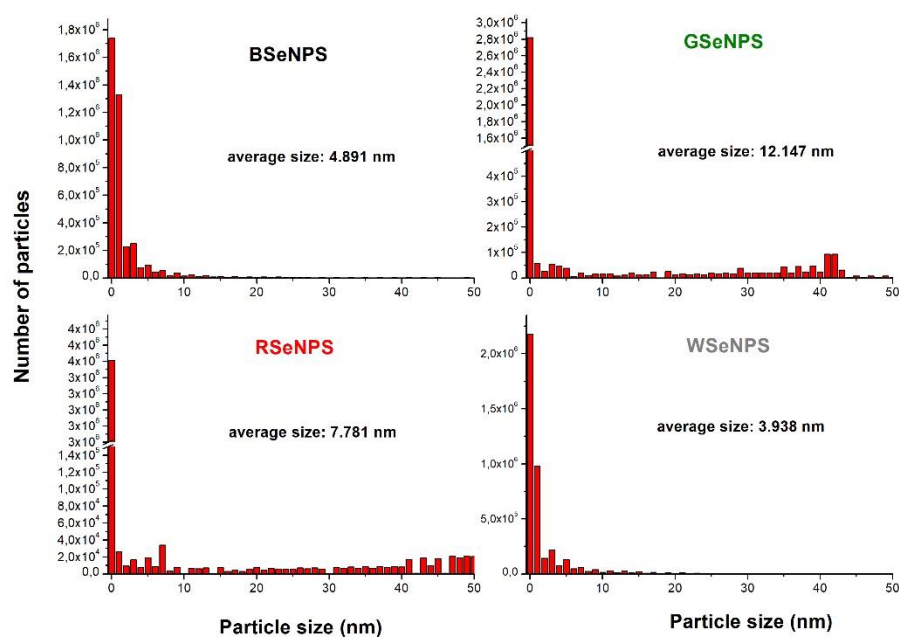

**Figure S1.** Size distribution of the synthesized SeNPs.

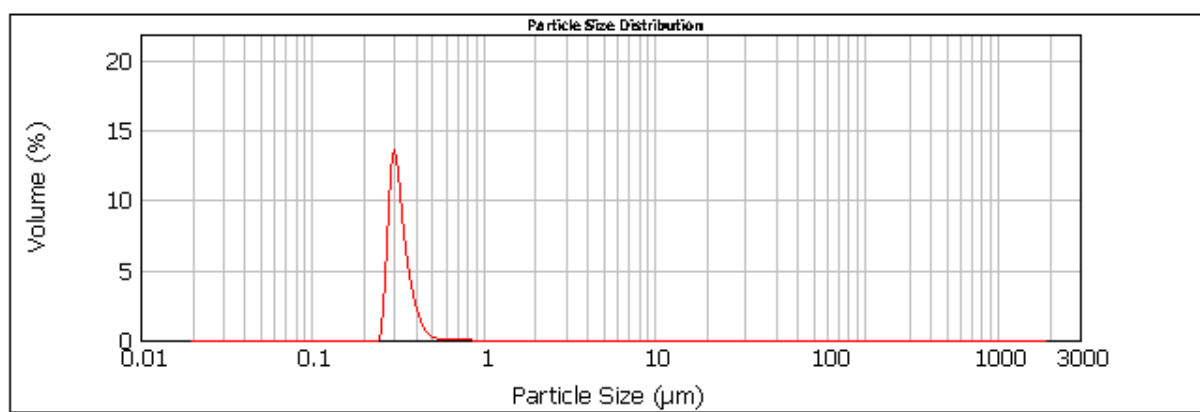

Figure S2. Particle size distribution in GSeNPs obtained by DLS method.

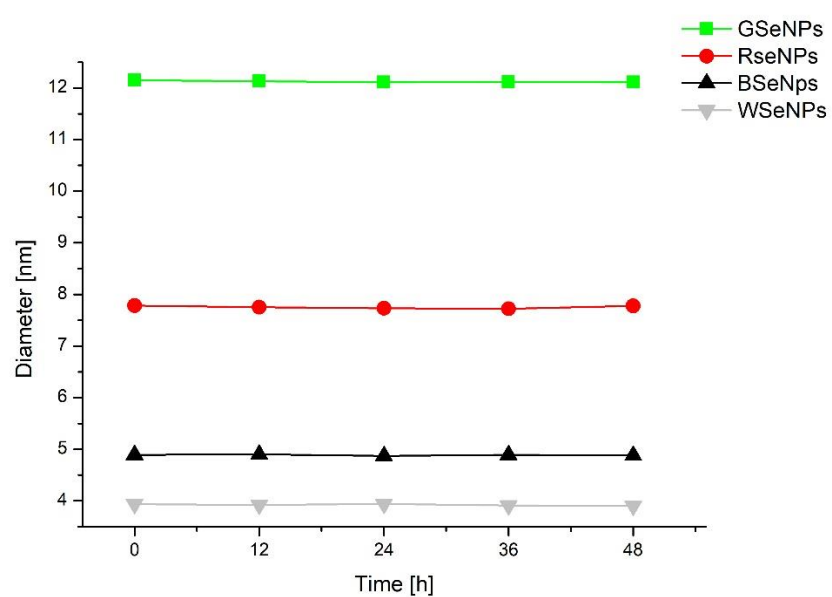

Figure S3. 48h stability of an average diameter of obtained SeNPs.

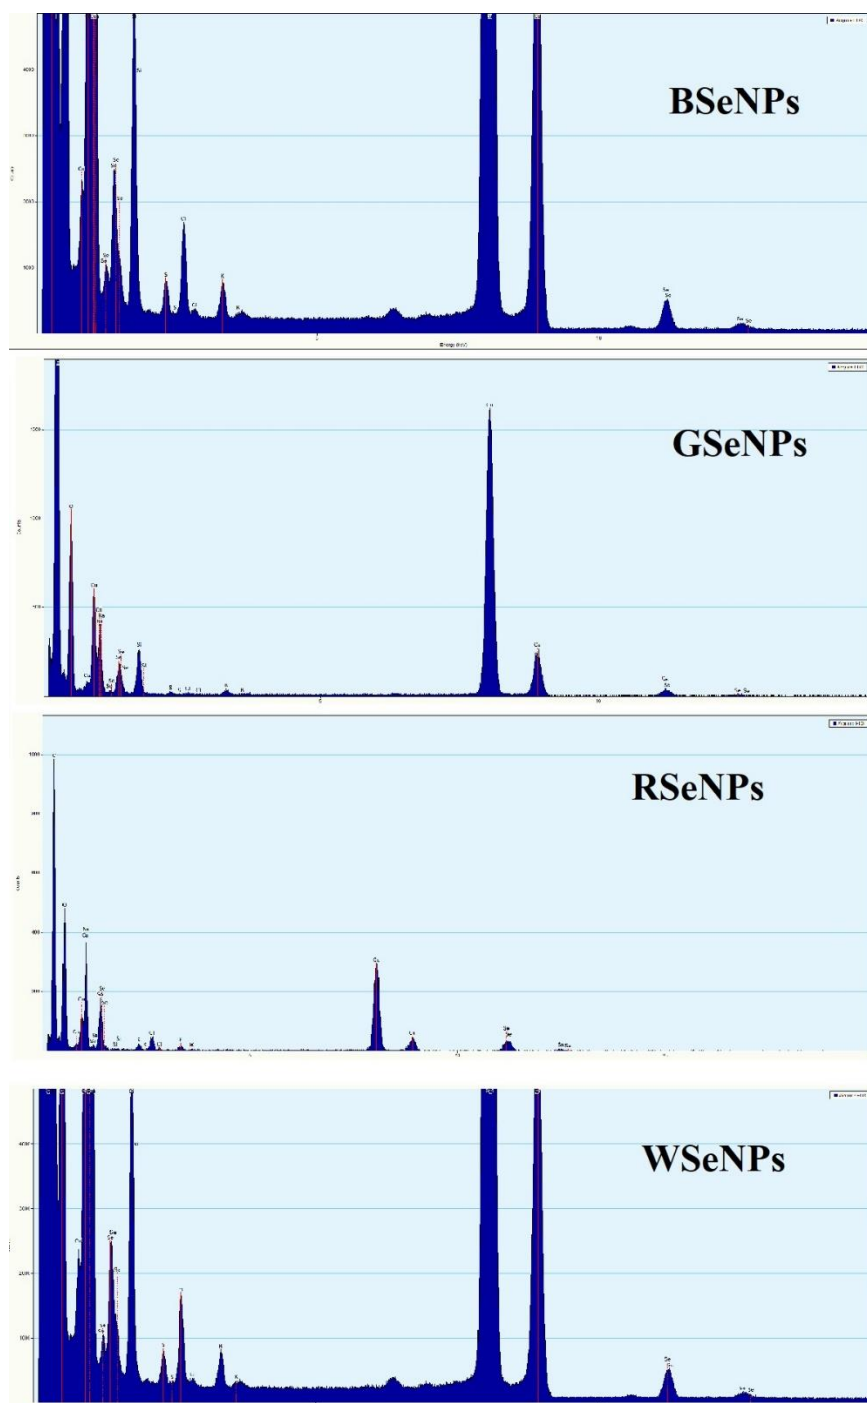

Figure S4. EDS spectra of BSeNPs, GSeNPs, RSeNPs and WSeNPs.
